# Supplementary material for: Gas-phase structure of 2,2,2-trichloroethyl chloroformate studied by electron diffraction and quantum-chemical calculations
Source: Royal Society of Chemistry journal article supplement (doi:10.1039/c5cp05295e), 2015-11-23
Supplement: c5cp05295e1.pdf [file c5cp05295e1.pdf]

Supplementary material for the article

**“Gas-phase structure of 2,2,2 - TrichloroethylChloroformate studied by electron diffraction and quantum chemical calculations”**

Diego M. Gil<sup>1</sup>, MaríaE. Tuttolomondo<sup>1</sup>, Sebastian Blomeyer<sup>2</sup>, Christian G. Reuter<sup>2</sup>, Norbert W. Mittel<sup>2</sup> and Aída Ben Altabef<sup>1,\*</sup>,<sup>‡</sup>

<sup>1</sup> INQUINOA (CONICET-UNT), Instituto de Química Física, Facultad de Bioquímica, Química y Farmacia, Universidad Nacional de Tucumán, San Lorenzo 456, T4000CAN. Tucumán. Argentina.

<sup>2</sup> Inorganic and Structural Chemistry, Centre for Molecular Materials CM<sub>2</sub>, Faculty of Chemistry, Bielefeld University, Universitätsstraße 25, 33615 Bielefeld, Germany.

---

|                                                                                                                                                                                                                                                                                                                          |    |
|--------------------------------------------------------------------------------------------------------------------------------------------------------------------------------------------------------------------------------------------------------------------------------------------------------------------------|----|
| <b>Figure S1:</b> Graphical representation of the two conformers of Cl <sub>3</sub> CCH <sub>2</sub> OC(O)Cl with the corresponding direction of dipole moment. ....                                                                                                                                                     | 2  |
| <b>Figure S2:</b> AIM plots for both conformers of Cl <sub>3</sub> CCH <sub>2</sub> OC(O)Cl. Red points indicate the bond critical point (BCP) for the bond lengths.....                                                                                                                                                 | 2  |
| <b>Figure S3:</b> Theoretical (line) and experimental (dots) sM(s) curves as well as delta curve (below) from GED data refinement using the dynamic model. ....                                                                                                                                                          | 3  |
| <b>Figure S4:</b> Theoretical (line) and experimental (dots)radial distribution curves as well as delta curve (below) from GED data refinement using the anti-gauche model, only. ....                                                                                                                                   | 3  |
| <b>Figure S5:</b> Theoretical (line) and experimental (dots) sM(s) curves as well as delta curve (below) from GED data refinement using the anti-gauche model, only.....                                                                                                                                                 | 4  |
| <b>Figure S6:</b> Theoretical (line) and experimental (dots) radial distribution curves as well as delta curve (below) from GED data refinement using the anti-anti model, only.....                                                                                                                                     | 4  |
| <b>Figure S7:</b> Theoretical (line) and experimental (dots) sM(s) curves as well as delta curve (below) from GED data refinement using the anti-anti model, only. ....                                                                                                                                                  | 5  |
| <b>Figure S8:</b> Simulated Raman spectra for both conformers of Cl <sub>3</sub> CCH <sub>2</sub> OC(O)Cl and the spectrum in liquid phase.....                                                                                                                                                                          | 6  |
| <b>Table S1:</b> Detailed conditions of the GED experiment.....                                                                                                                                                                                                                                                          | 8  |
| <b>Table S2:</b> Optimized structural parameters (bond lengths, angles and selected dihedral angles) for both conformers of Cl <sub>3</sub> CCH <sub>2</sub> OC(O)Cl calculated at PBEPBE and MP2 methods with 6-311G(3df,2pd) basis sets as well as experimental ones obtained from gas electron diffraction data. .... | 9  |
| <b>Table S3:</b> Relative abundances (MP2/6-311G(d,p), 328 K) for pseudoconformers used in the dynamic model for structure refinement of gas-phase electron diffraction data.....                                                                                                                                        | 10 |
| <b>Table S4:</b> The calculated thermodynamic and molecular parameters (298.15 K) for both conformations of Cl <sub>3</sub> CCH <sub>2</sub> OC(O)Cl calculated at B3LYP/6-311++G(d,p) level.....                                                                                                                        | 11 |
| <b>Table S5:</b> C–O, C–C and C=O bond lengths (Å), electron occupancy and energy (kJ·mol <sup>-1</sup> ) of the natural bond orbitals for Cl <sub>3</sub> CCH <sub>2</sub> OC(O)Cl. <sup>a</sup> .....                                                                                                                  | 12 |
| <b>Table S6:</b> The charge distribution calculated by the Mulliken method using DFT/B3LYP/6-311++G(d,p) for C <sub>1</sub> and C <sub>s</sub> conformers of Cl <sub>3</sub> CCH <sub>2</sub> OC(O)Cl.....                                                                                                               | 12 |
| <b>Table S7:</b> Calculated Fukui functions ( $f_k^+$ , $f_k^-$ , $f_k^0$ ) and local reactivity properties ( $S$ and $\omega$ ).....                                                                                                                                                                                    | 13 |



**Figure S1:** Graphical representation of the two conformers of  $\text{Cl}_3\text{CCH}_2\text{OC(O)Cl}$  with the corresponding direction of the dipole moment.

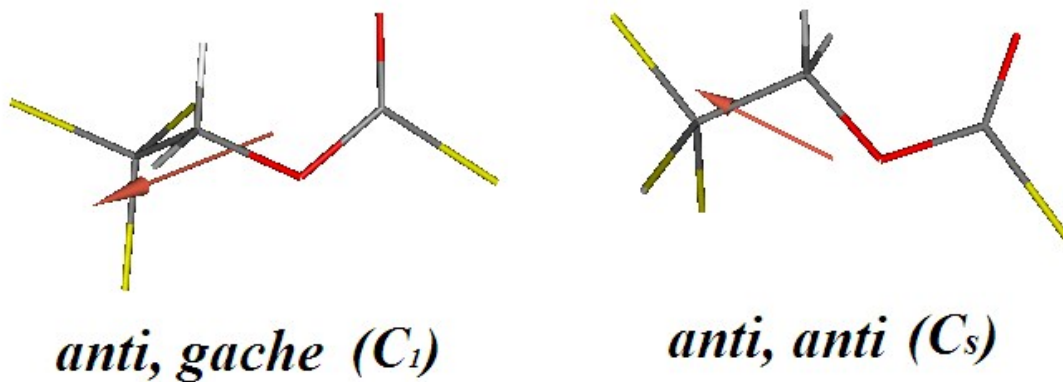

**Figure S2:** AIM plots for both conformers of  $\text{Cl}_3\text{CCH}_2\text{OC(O)Cl}$ . Red points indicate the bond critical points (BCP) for atomic interactions (on the atomic interactions lines, also called bond paths).

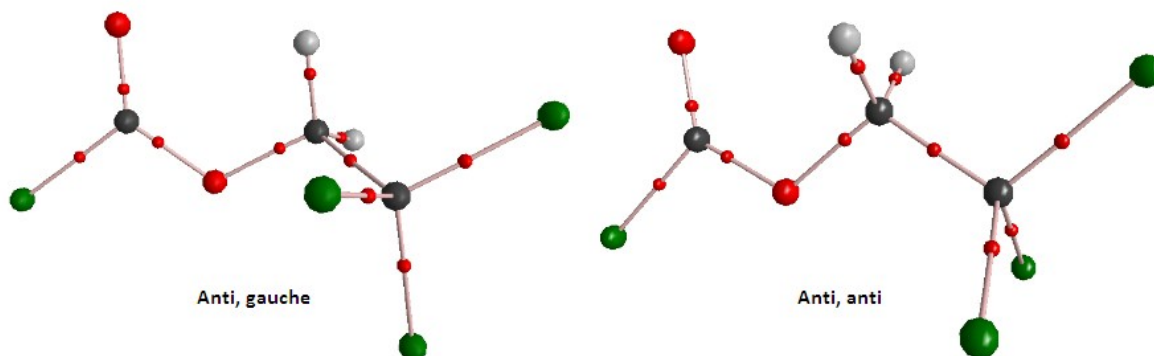

**Figure S3:** Theoretical (line) and experimental (dots)  $sM(s)$  curves as well as delta curve (below) from GED data refinement using the dynamic model.

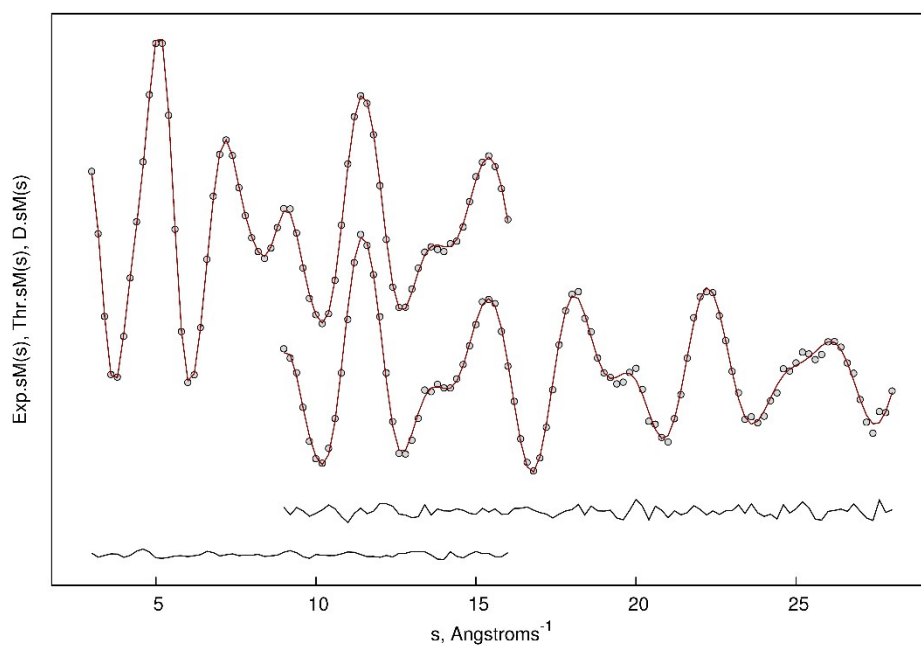

**Figure S4:** Theoretical (line) and experimental (dots) radial distribution curves as well as delta curve (below) from GED data refinement using the *anti-gauche* model, only.

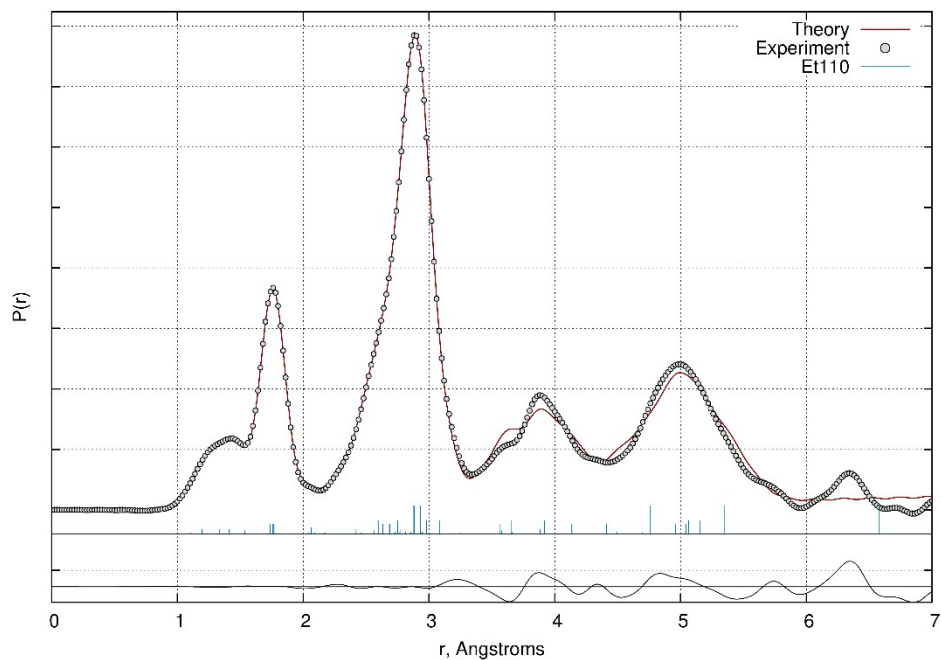

**Figure S5:** Theoretical (line) and experimental (dots)  $sM(s)$  curves as well as delta curve (below) from GED data refinement using the *anti-gauche* model, only.

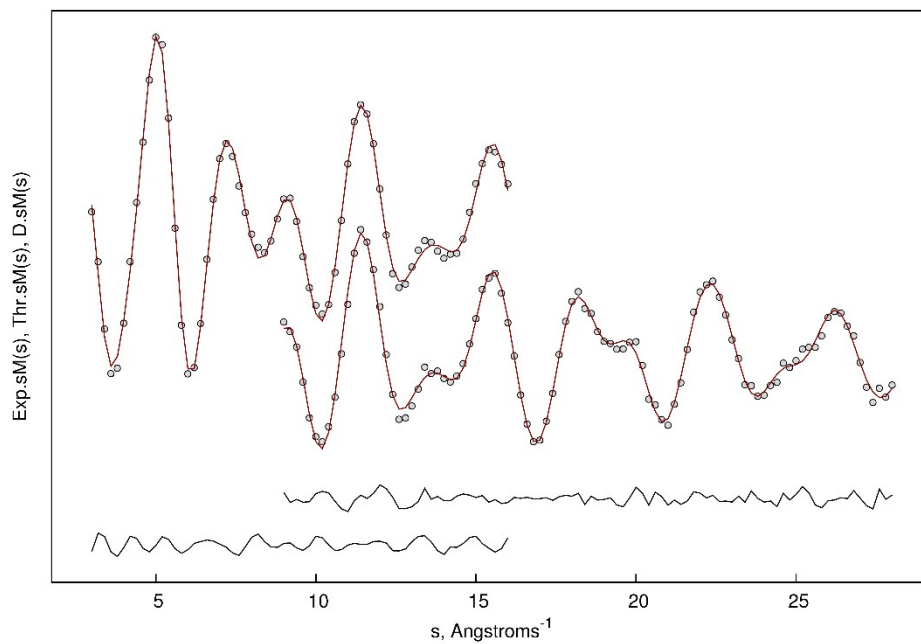

**Figure S6:** Theoretical (line) and experimental (dots) radial distribution curves as well as delta curve (below) from GED data refinement using the *anti-anti* model, only.

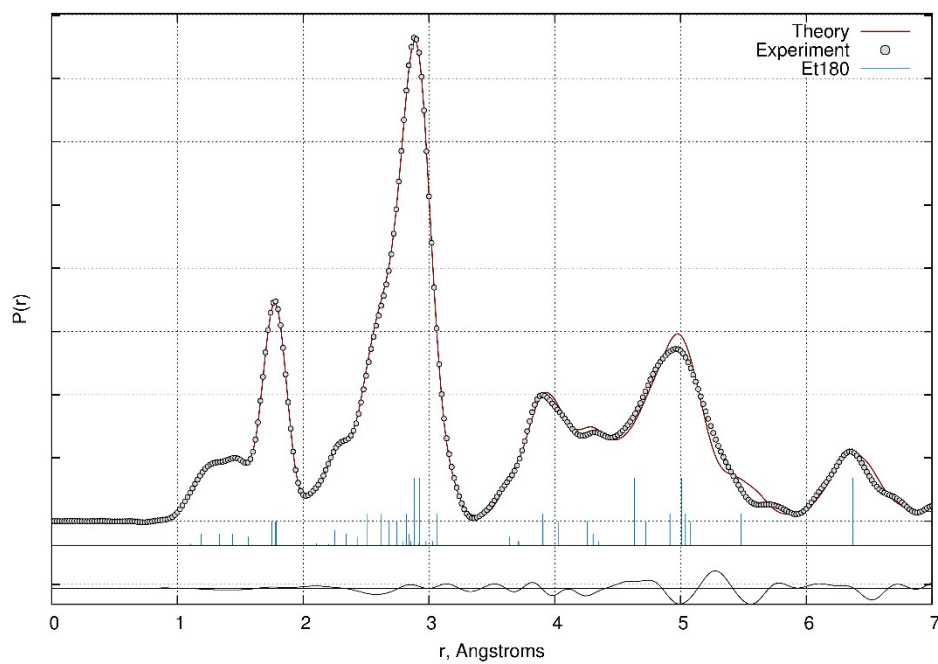

**Figure S7:** Theoretical (line) and experimental (dots)  $sM(s)$  curves as well as delta curve (below) from GED data refinement using the *anti-anti* model, only.

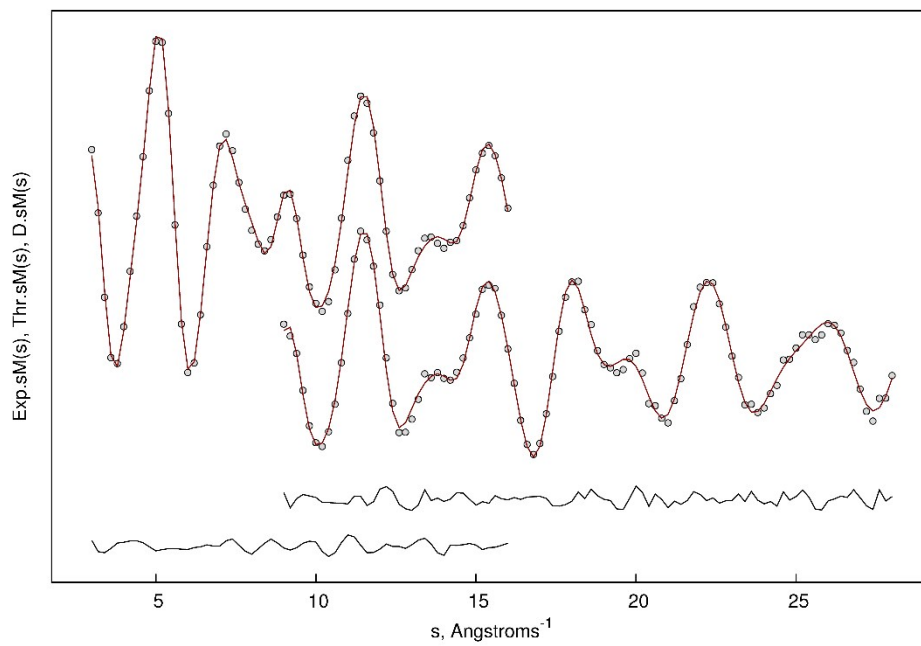

**Figure S8:** Simulated Raman spectra for both conformers of  $\text{Cl}_3\text{CCH}_2\text{OC(O)Cl}$  and the spectrum in liquid phase.

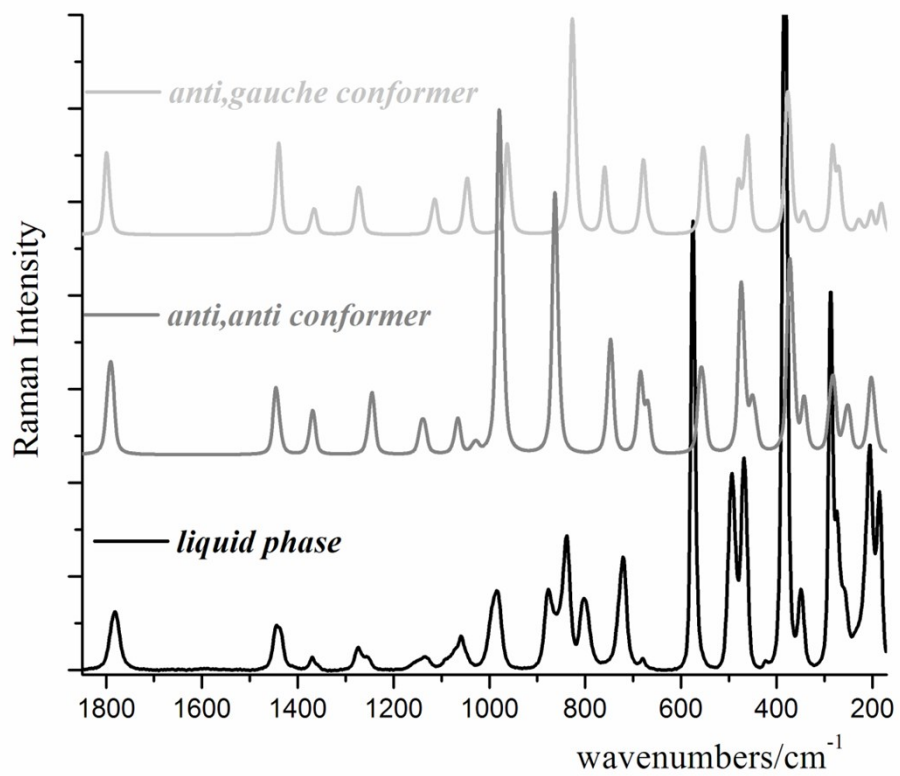

**Table S1:** Detailed conditions of the GED experiments.

|                                           | data set 1         | data set 2         |
|-------------------------------------------|--------------------|--------------------|
| nozzle-to-plate distance (mm)             | 500                | 250                |
| electron beam current (nA)                | 1000               | 1000               |
| electron wavelength (Å)                   | 0.048799           | 0.048636           |
| exposure time (s)                         | 10–15              | 10–20              |
| background pressure (mbar)                | $3 \times 10^{-7}$ | $3 \times 10^{-7}$ |
| residual gas pressure <sup>a</sup> (mbar) | $1 \times 10^{-6}$ | $1 \times 10^{-6}$ |

<sup>a</sup> During recording.



**Table S2:** Optimized structural parameters (bond lengths, angles and selected dihedral angles) for both conformers of Cl<sub>3</sub>CCH<sub>2</sub>OC(O)Cl calculated at PBEPBE and MP2 methods with 6-311G(3df,2pd) basis sets as well as experimental ones obtained from gas electron diffraction data.

| Parameter <sup>a</sup> | C <sub>1</sub> conformer |       |             | C <sub>s</sub> conformer |       |             | Experimental <sup>b</sup> |
|------------------------|--------------------------|-------|-------------|--------------------------|-------|-------------|---------------------------|
|                        | PBEPBE                   | MP2   |             | PBEPBE                   | MP2   |             |                           |
|                        | 6-311G(3df,2pd)          |       | 6-311G(d,p) | 6-311G(3df,2pd)          |       | 6-311G(d,p) |                           |
| C(4)-H mean            | 1.097                    | 1.087 | 1.090       | 1.098                    | 1.089 | 1.091       | 1.090(15) <sup>5.0</sup>  |
| C(1)-Cl(8)             | 1.760                    | 1.734 | 1.742       | 1.761                    | 1.735 | 1.742       | 1.744(2) <sub>a</sub>     |
| C(1)=O(2)              | 1.194                    | 1.189 | 1.191       | 1.196                    | 1.192 | 1.194       | 1.184(8) <sup>5.0</sup>   |
| C(1)-O(3)              | 1.349                    | 1.341 | 1.345       | 1.342                    | 1.334 | 1.338       | 1.327(9) <sup>5.0</sup>   |
| O(3)-C(4)              | 1.438                    | 1.422 | 1.425       | 1.442                    | 1.427 | 1.428       | 1.422(10) <sup>5.0</sup>  |
| C(4)-C(5)              | 1.531                    | 1.524 | 1.523       | 1.526                    | 1.519 | 1.518       | 1.535(10) <sup>5.0</sup>  |
| C(5)-Cl mean           | 1.786                    | 1.763 | 1.770       | 1.785                    | 1.763 | 1.770       | 1.772(2) <sub>a</sub>     |
| O(2)=C(1)-Cl(8)        | 124.1                    | 124.3 | 124.2       | 124.4                    | 124.5 | 124.5       | 124.9(17) <sup>0.5</sup>  |
| O(2)=C(1)-O(3)         | 128.3                    | 127.8 | 127.9       | 127.4                    | 126.8 | 126.8       | 126.2(9)                  |
| Cl(8)-C(1)-O(3)        | 107.6                    | 107.9 | 107.9       | 108.2                    | 108.6 | 108.7       | 108.9(14) <sup>0.5</sup>  |
| C(1)-O(3)-C(4)         | 115.6                    | 115.3 | 115.2       | 113.2                    | 112.7 | 112.5       | 110.6(23) <sup>0.5</sup>  |
| O(3)-C(4)-C(5)         | 110.2                    | 109.3 | 110.1       | 107.9                    | 106.9 | 107.5       | 105.1(10) <sup>0.5</sup>  |
| Cl-C(5)-Cl             | 109.7                    | 109.8 | 110.3       | 109.7                    | 109.9 | 110.3       | 109.2(9) <sup>0.5</sup>   |
| Cl(8)-C(1)-O(3)-C(4)   | 178.9                    | 176.3 | 177.2       | 179.9                    | 179.9 | 180.0       | 179.1(24) <sup>0.5</sup>  |
| C(1)-O(3)-C(4)-C(5)    | 116.3                    | 107.5 | 109.9       | 179.9                    | 179.9 | 180.0       | Fixed to 180.0            |

<sup>a</sup> Bond lengths in Å, angles in degrees. See Figure 2a and 2b for numbering of atoms.

<sup>b</sup> Values for conformer of C<sub>s</sub> symmetry, standard deviations given as 3σ<sub>LS</sub>, superscript numbers indicate the regularization coefficient, subscript letters state if parameters were refined in groups with fixed differences in between. The O(2)=C(1)-O(3) angle was not refined explicitly results from O(2)=C(1)-Cl(8), Cl(8)-C(1)-O(3) and the assumed planarity of the Cl(8)-C(1)-O(2)-O(3) moiety.

**Table S3:** Relative abundances (MP2/6-311G(d,p), 328 K) for pseudoconformers used in the dynamic model for structure refinement of gas-phase electron diffraction data.

| $\Phi$ (pseudoconformer) / ° | rel. abundance <sup>a</sup> / % |
|------------------------------|---------------------------------|
| 100                          | 12.14 (2)                       |
| 110                          | 18.10 (2)                       |
| 120                          | 14.63 (2)                       |
| 130                          | 10.53 (2)                       |
| 140                          | 8.64 (2)                        |
| 150                          | 8.54 (2)                        |
| 160                          | 9.74 (2)                        |
| 170                          | 11.49 (2)                       |
| 180                          | 6.18 (1)                        |

**Table S4:** The calculated thermodynamic and molecular parameters (298.15 K) for both conformations of  $\text{Cl}_3\text{CCH}_2\text{OC}(\text{O})\text{Cl}$  calculated at B3LYP/6-311++G(d,p) level.

| Parameter                                                 | $\text{C}_1$ conformer | $\text{C}_s$ conformer |
|-----------------------------------------------------------|------------------------|------------------------|
| <i>Thermal Energy (kcal mol<sup>-1</sup>)</i>             |                        |                        |
| Translational                                             | 0.889                  | 0.889                  |
| Rotational                                                | 0.889                  | 0.889                  |
| Vibrational                                               | 37.426                 | 37.412                 |
| Total                                                     | 39.204                 | 39.189                 |
| <i>Heat capacity (cal mol<sup>-1</sup>K<sup>-1</sup>)</i> |                        |                        |
| Translational                                             | 2.981                  | 2.981                  |
| Rotational                                                | 2.981                  | 2.981                  |
| Vibrational                                               | 26.207                 | 26.242                 |
| Total                                                     | 32.169                 | 32.203                 |
| <i>Entropy (cal mol<sup>-1</sup>K<sup>-1</sup>)</i>       |                        |                        |
| Translational                                             | 41.928                 | 41.928                 |
| Rotational                                                | 31.379                 | 31.523                 |
| Vibrational                                               | 29.708                 | 30.293                 |
| Total                                                     | 103.015                | 103.743                |
| <i>Dipole moment (Debye)</i>                              |                        |                        |
| $\mu_x$                                                   | -1.0746                | 1.0464                 |
| $\mu_y$                                                   | 0.2817                 | 0.2789                 |
| $\mu_z$                                                   | -1.3582                | -0.0004                |
| Total                                                     | 1.7546                 | 1.1118                 |
| <i>Rotational constants (GHz)</i>                         |                        |                        |
| A                                                         | 1.47537                | 1.43175                |
| B                                                         | 0.45918                | 0.42809                |
| C                                                         | 0.42998                | 0.41123                |
| <i>Rotational temperature (K)</i>                         |                        |                        |
| A                                                         | 0.07081                | 0.06871                |
| B                                                         | 0.02204                | 0.02055                |
| C                                                         | 0.02064                | 0.01974                |
| <i>Thermal properties (Hartree/particle)</i>              |                        |                        |
| Zero-point (ZP) correction                                | 0.052699               | 0.052618               |
| Thermal correction to energy                              | 0.062475               | 0.062452               |
| Thermal correction to enthalpy                            | 0.063419               | 0.063397               |
| Thermal correction to Gibbs free energy                   | 0.014473               | 0.014105               |
| Sum of electronic and ZP energies                         | -2106.885133           | -2106.885409           |
| Sum of electronic and thermal energies                    | -2106.875357           | -2106.875575           |
| Sum of electronic and thermal enthalpies                  | -2106.874413           | -2106.874630           |
| Sum of electronic and thermal free energies               | -2106.923358           | -2106.923922           |

**Table S5:** C–O, C–C and C=O bond lengths (Å), electron occupancy and energy (kJ·mol<sup>-1</sup>) of the natural bond orbitals for Cl<sub>3</sub>CCH<sub>2</sub>OC(O)Cl.<sup>a</sup>

|                     | <i>anti-gauche</i> (C <sub>1</sub> ) | <i>anti-anti</i> (C <sub>s</sub> ) |
|---------------------|--------------------------------------|------------------------------------|
| <b>d(C(4)–O(3))</b> | 1.437                                | 1.439                              |
| Occupancy σ C–O     | 1.98079                              | 1.97991                            |
| Energy              | -0.88590                             | -0.88107                           |
| Occupancy σ* C–O    | 0.03832                              | 0.03853                            |
| Energy              | 0.20020                              | 0.19495                            |
| <b>d(C(4)–C(5))</b> | 1.531                                | 1.527                              |
| Occupancy σ C–C     | 1.98863                              | 1.98882                            |
| Energy              | -0.74432                             | -0.74932                           |
| Occupancy σ* C–C    | 0.05563                              | 0.05149                            |
| Energy              | 0.26401                              | 0.26900                            |
| <b>d(C(1)=O(2))</b> | 1.187                                | 1.189                              |
| Occupancy σ C=O     | 1.99786                              | 1.99743                            |
| Energy              | -1.18324                             | -1.18148                           |
| Occupancy σ* C=O    | 0.02937                              | 0.02890                            |
| Energy              | 0.58802                              | 0.58460                            |

<sup>a</sup> Calculated at B3LYP/6-311++G(d,p) level.

**Table S6:** The charge distribution calculated by the Mulliken method using DFT/B3LYP/6-311++G(d,p) for C<sub>1</sub> and C<sub>s</sub> conformers of Cl<sub>3</sub>CCH<sub>2</sub>OC(O)Cl.

| Atoms <sup>a</sup> | Atomic charges (Mulliken) |                          |
|--------------------|---------------------------|--------------------------|
|                    | C <sub>1</sub> conformer  | C <sub>s</sub> conformer |
| C(1)               | 0.75868                   | 0.75579                  |
| O(2)               | -0.54270                  | -0.54404                 |
| O(3)               | -0.55163                  | -0.54713                 |
| C(4)               | -0.08703                  | -0.08622                 |
| C(5)               | -0.18376                  | -0.17993                 |
| H(6)               | 0.23756                   | 0.22466                  |
| H(7)               | 0.22189                   | 0.22465                  |
| Cl(8)              | -0.00724                  | -0.00776                 |
| Cl(9)              | 0.05240                   | 0.05650                  |
| Cl(10)             | 0.04597                   | 0.04696                  |
| Cl(11)             | 0.05585                   | 0.05652                  |

<sup>a</sup> See Fig. 2 for atoms numbering scheme.
